# Supplementary material for: Cervical cancer case–control audit: Results from routine evaluation of a nationwide cervical screening program
Source: PubMed Central journal article supplement — Int J Cancer. 2019 Jun 3;146(5):1230–40. doi: 10.1002/ijc.32416 (PMC7003887; doi:10.1002/ijc.32416), 2019-06-03
Supplement: IJC-146-1230-s001.pdf [file IJC-146-1230-s001.pdf]

## Supplementary Results

Supplementary Table 1: Number of case-control sets with different number of controls after removing women having had total hysterectomy

| Number of controls | Number of case-control sets (%) |
|--------------------|---------------------------------|
| 27                 | 2 (0.1)                         |
| 28                 | 14 (0.3)                        |
| 29                 | 165 (3.9)                       |
| 30                 | 4073 (95.7)                     |
| Total              | 4254 (100.0)                    |

Supplementary Figure 1: Distribution of months between the first abnormality in the past year and cervical cancer diagnosis by mode of detection recorded in the clinical chart

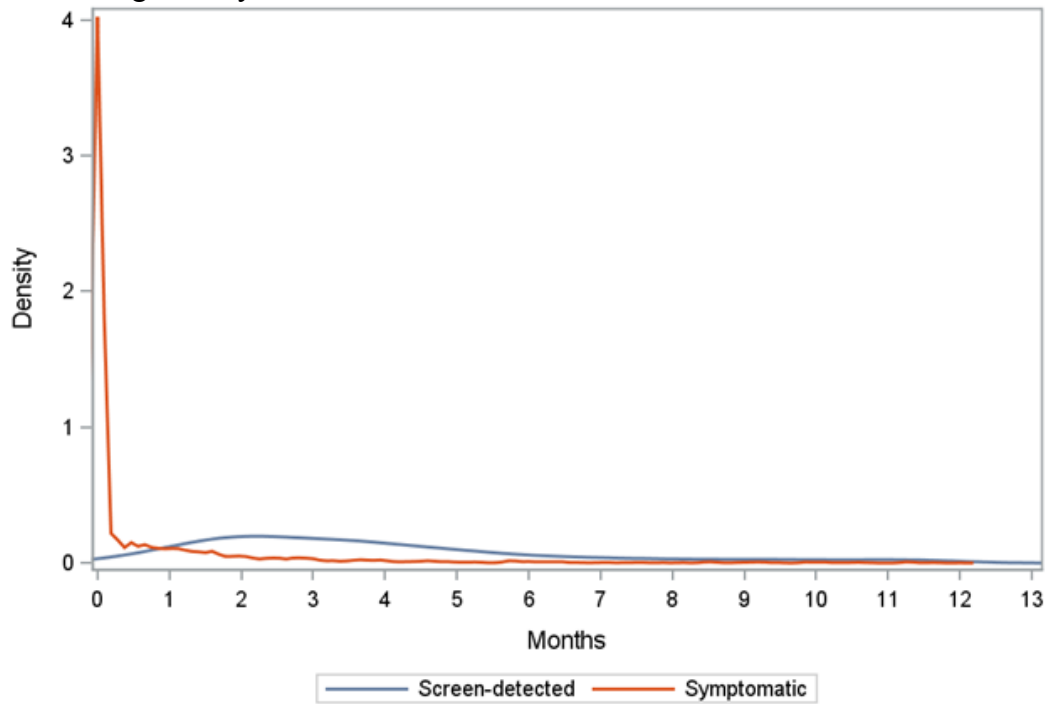

In this Audit, mode of detection (screen-detected or symptomatic) of all cervical cancer cases in 2002-2011 was retrieved from the clinical charts. To verify the time-frame of 6 months for removing Pap test that leads to cancer diagnosis (i.e. non-preventive test), this data was linked to the Swedish National Cervical Screening Registry (NKCx) to retrieve the last abnormal screening test in the past one year. We plotted the distribution of time (in months) between the first abnormality and cervical cancer diagnosis by mode of detection.

The result in the figure above clearly shows that the majority of cervical cancer cases had the initial abnormality within 6 months before cancer diagnosis, therefore when evaluating the screening tests leading to cancer prevention, all Pap tests within 6 months should be disregarded. The result further indicates that if the initial abnormality is within one month before cancer diagnosis, it is more likely to be a symptomatic cancer. The time-frames evaluated in this analysis can be used as a proxy in future studies which need to distinguish mode of detection of cervical cancer in absence of clinical data.

Supplementary Table 2: SNOMED codes for cytological diagnoses in the study, defined by the Swedish Association for Clinical Cytology

| Cytological diagnosis                                | SNOMED code |
|------------------------------------------------------|-------------|
| Normal cytology                                      | M00110      |
| Low-grade abnormalities                              |             |
| Atypical squamous cells of undetermined significance | M69710      |
| Mild squamous dysplasia                              | M74006      |
| High-grade abnormalities                             |             |
| Suspected high-grade squamous dysplasia              | M69719      |
| Moderate squamous dysplasia                          | M74007      |
| Severe squamous dysplasia                            | M80702      |
| Atypical glandular cells                             | M69720      |
| Atypical cells of uncertain origin                   | M69700      |
| Squamous cell cancer                                 | M80703      |
| Adenocarcinoma/Adenocarcinoma in situ                | M81403      |
| Malignancy of uncertain origin                       | M80009      |

Supplementary Table 3: Odds ratios of cervical cancer (all stages, aged 29+) by screening status in the past two screening rounds, by histopathological type, further adjusted for parity

| Screening history <sup>a</sup> | All types       |                        |                                          | Squamous cell cancer |                        |                                          | Adenocarcinoma  |                        |                                          |
|--------------------------------|-----------------|------------------------|------------------------------------------|----------------------|------------------------|------------------------------------------|-----------------|------------------------|------------------------------------------|
|                                | Crude OR        | Adjusted for education | Adjusted further for parity <sup>b</sup> | Crude OR             | Adjusted for education | Adjusted further for parity <sup>b</sup> | Crude OR        | Adjusted for education | Adjusted further for parity <sup>b</sup> |
| Unscr. – Unscr.                | 4.03(3.69-4.40) | 4.14(3.79-4.52)        | 4.53(4.13-4.96)                          | 5.15(4.65-5.72)      | 5.28(4.75-5.87)        | 5.80(5.20-6.46)                          | 1.61(1.30-1.98) | 1.70(1.38-2.10)        | 1.80(1.44-2.25)                          |
| Scr. – Unscr.                  | 2.41(2.18-2.65) | 2.40(2.18-2.65)        | 2.45(2.22-2.71)                          | 2.60(2.31-2.93)      | 2.60(2.31-2.93)        | 2.65(2.35-3.00)                          | 1.94(1.60-2.35) | 1.95(1.61-2.37)        | 2.07(1.70-2.52)                          |
| Unscr. – Scr.                  | 1.62(1.46-1.81) | 1.63(1.46-1.81)        | 1.57(1.40-1.76)                          | 1.89(1.66-2.15)      | 1.89(1.66-2.16)        | 1.82(1.59-2.09)                          | 1.10(0.87-1.39) | 1.11(0.88-1.40)        | 1.06(0.84-1.36)                          |
| Scr. – Scr.                    | Ref.            | Ref.                   | Ref.                                     | Ref.                 | Ref.                   | Ref.                                     | Ref.            | Ref.                   | Ref.                                     |

Unscr. = Unscreened; Scr. = Screened

- a. Left-hand side of hyphen represents the previous screening round, and right-hand side represents the most recent screening round
- b. Restricted to women born in 1932 and onward, due to lack of complete in the Multi-Generation Register before 1932. There were 775 (18%) case subjects born before 1932 thus were not included in the sensitivity analysis. They were at age 70-98 at cancer diagnosis. Age-specific comparisons were presented in Supplementary Table 4.

Supplementary Table 4: Odds ratios of cervical cancer (all stages) by screening status in the past two screening rounds, by age and histopathological type, further adjusted for parity

| Screening history <sup>a</sup> | All types       |                        |                             | Squamous cell cancer |                        |                             | Adenocarcinoma  |                        |                             |
|--------------------------------|-----------------|------------------------|-----------------------------|----------------------|------------------------|-----------------------------|-----------------|------------------------|-----------------------------|
|                                | Crude OR        | Adjusted for education | Adjusted further for parity | Crude OR             | Adjusted for education | Adjusted further for parity | Crude OR        | Adjusted for education | Adjusted further for parity |
| <b>Age 26-28<sup>b</sup></b>   |                 |                        |                             |                      |                        |                             |                 |                        |                             |
| Unscreened                     | 1.75(1.23-2.48) | 2.04(1.43-2.91)        | 1.95(1.37-2.79)             | 2.00(1.32-3.04)      | 2.31(1.51-3.53)        | 2.29(1.49-3.50)             | 0.75(0.30-1.86) | 0.87(0.35-2.16)        | 0.65(0.25-1.66)             |
| Screened                       | Ref.            | Ref.                   | Ref.                        | Ref.                 | Ref.                   | Ref.                        | Ref.            | Ref.                   | Ref.                        |
| <b>Age 29-39</b>               |                 |                        |                             |                      |                        |                             |                 |                        |                             |
| Unscr. – Unscr.                | 2.62(2.20-3.12) | 2.92(2.44-3.49)        | 2.71(2.26-3.25)             | 3.35(2.72-4.12)      | 3.63(2.93-4.48)        | 3.39(2.74-4.21)             | 1.14(0.74-1.73) | 1.39(0.90-2.13)        | 1.30(0.84-2.01)             |
| Scr. – Unscr.                  | 3.05(2.59-3.59) | 3.05(2.59-3.59)        | 3.04(2.58-3.58)             | 3.37(2.76-4.12)      | 3.36(2.75-4.11)        | 3.36(2.75-4.11)             | 2.49(1.81-3.41) | 2.55(1.86-3.49)        | 2.52(1.84-3.46)             |
| Unscr. – Scr.                  | 1.48(1.23-1.79) | 1.49(1.23-1.80)        | 1.48(1.22-1.79)             | 1.79(1.43-2.24)      | 1.79(1.43-2.24)        | 1.78(1.42-2.23)             | 0.84(0.55-1.27) | 0.86(0.56-1.31)        | 0.85(0.56-1.29)             |
| Scr. – Scr.                    | Ref.            | Ref.                   | Ref.                        | Ref.                 | Ref.                   | Ref.                        | Ref.            | Ref.                   | Ref.                        |
| <b>Age 40-49</b>               |                 |                        |                             |                      |                        |                             |                 |                        |                             |
| Unscr. – Unscr.                | 5.02(4.22-5.98) | 5.17(4.33-6.18)        | 5.25(4.39-6.29)             | 6.58(5.30-8.15)      | 6.69(5.38-8.33)        | 6.87(5.52-8.55)             | 2.39(1.63-3.49) | 2.56(1.74-3.77)        | 2.48(1.68-3.68)             |
| Scr. – Unscr.                  | 2.72(2.24-3.31) | 2.72(2.24-3.32)        | 2.72(2.24-3.32)             | 3.09(2.41-3.95)      | 3.09(2.41-3.96)        | 3.09(2.41-3.95)             | 2.48(1.74-3.54) | 2.50(1.75-3.57)        | 2.50(1.75-3.56)             |
| Unscr. – Scr.                  | 1.72(1.38-2.13) | 1.72(1.39-2.13)        | 1.73(1.39-2.14)             | 2.01(1.54-2.62)      | 2.01(1.54-2.62)        | 2.02(1.54-2.64)             | 1.26(0.83-1.91) | 1.27(0.83-1.93)        | 1.25(0.82-1.91)             |
| Scr. – Scr.                    | Ref.            | Ref.                   | Ref.                        | Ref.                 | Ref.                   | Ref.                        | Ref.            | Ref.                   | Ref.                        |
| <b>Age 50-65</b>               |                 |                        |                             |                      |                        |                             |                 |                        |                             |
| Unscr. – Unscr.                | 6.16(5.30-7.16) | 6.21(5.34-7.24)        | 6.38(5.48-7.43)             | 7.65(6.42-9.11)      | 7.73(6.48-9.23)        | 7.99(6.68-9.54)             | 1.95(1.28-2.97) | 2.01(1.32-3.06)        | 2.05(1.34-3.12)             |
| Scr. – Unscr.                  | 2.03(1.67-2.47) | 2.03(1.67-2.46)        | 2.03(1.67-2.47)             | 2.17(1.72-2.74)      | 2.17(1.72-2.74)        | 2.17(1.72-2.74)             | 1.17(0.74-1.84) | 1.17(0.74-1.85)        | 1.18(0.75-1.86)             |
| Unscr. – Scr.                  | 1.53(1.24-1.90) | 1.54(1.24-1.91)        | 1.53(1.24-1.90)             | 1.68(1.30-2.16)      | 1.68(1.30-2.16)        | 1.67(1.30-2.16)             | 1.20(0.75-1.93) | 1.22(0.76-1.96)        | 1.23(0.76-1.97)             |
| Scr. – Scr.                    | Ref.            | Ref.                   | Ref.                        | Ref.                 | Ref.                   | Ref.                        | Ref.            | Ref.                   | Ref.                        |

Unscr. = Unscreened; Scr. = Screened

- a. Left hand side of hyphen represents the previous screening round, and right-hand side represents the most recent screening round
- b. Only one screening round was assessed due to age

Supplementary Table 5: Odds ratios of cervical cancer in relation to screening status in the past two screening rounds, defining screening intervals as 3/5 years and 3.5/5.5 years

| Screening history <sup>a</sup> | Interval 3 and 5 years |                     |                 |                          | Interval 3.5 and 5.5 years |                     |                 |                          |
|--------------------------------|------------------------|---------------------|-----------------|--------------------------|----------------------------|---------------------|-----------------|--------------------------|
|                                | No. of case sub.       | No. of control sub. | OR              | OR adjusted <sup>b</sup> | No. of case sub.           | No. of control sub. | OR              | OR adjusted <sup>b</sup> |
| Unscr. – Unscr.                | 1711                   | 29670               | 4.03(3.69-4.40) | 4.14(3.79-4.52)          | 1640                       | 28485               | 3.87(3.55-4.21) | 4.00(3.67-4.37)          |
| Scr. – Unscr.                  | 783                    | 17716               | 2.41(2.18-2.65) | 2.40(2.18-2.65)          | 663                        | 14682               | 2.34(2.12-2.58) | 2.34(2.12-2.58)          |
| Unscr. – Scr.                  | 502                    | 16401               | 1.62(1.46-1.81) | 1.63(1.46-1.81)          | 458                        | 13712               | 1.67(1.50-1.86) | 1.68(1.50-1.87)          |
| Scr. – Scr.                    | 1045                   | 51829               | Ref.            | Ref.                     | 1280                       | 58737               | Ref.            | Ref.                     |

Unscr. = Unscreened; Scr. = Screened

- a. Left hand side of hyphen represents the previous screening round, and right-hand side represents the most recent screening round
- b. Only one screening round was assessed due to age

Supplementary Table 6: Odds ratios of cervical cancer (all stages) among women having abnormalities compared to women unscreened in the past two screening rounds, by histological type

| Screening history <sup>a</sup> | Squamous cell cancer |                     |               |                          | Adenocarcinoma   |                     |                |                          |
|--------------------------------|----------------------|---------------------|---------------|--------------------------|------------------|---------------------|----------------|--------------------------|
|                                | No. of case sub.     | No. of control sub. | OR            | OR adjusted <sup>a</sup> | No. of case sub. | No. of control sub. | OR             | OR adjusted <sup>a</sup> |
| Unscr. – Unscr.                | 1368                 | 22099               | Ref.          | Ref.                     | 207              | 5103                | Ref.           | Ref.                     |
| Abn. – Nor.                    | 52                   | 1139                | 0.5 (0.4-0.7) | 0.5 (0.4-0.7)            | 27               | 354                 | 1.8 (1.1-2.7)  | 1.6 (1.1-2.5)            |
| Abn. – Unscr.                  | 62                   | 206                 | 3.7 (2.7-4.9) | 3.5 (2.6-4.7)            | 17               | 57                  | 6.6 (3.7-11.7) | 6.2 (3.5-11.1)           |
| Nor./Unscr. – Abn.             | 272                  | 1199                | 2.5 (2.2-3.0) | 2.5 (2.1-2.9)            | 74               | 317                 | 5.2 (3.8-7.1)  | 4.9 (3.6-6.7)            |
| Abn. – Abn.                    | 45                   | 226                 | 2.3 (1.6-3.1) | 2.2 (1.6-3.1)            | 23               | 68                  | 7.7 (4.6-12.7) | 7.2 (4.4-12.0)           |

Nor. = normal; Abn. = abnormal; Unscr. = unscreened.

- a. Left-hand side of hyphen represents the previous screening round, and right-hand side represents the most recent screening round
- b. Adjusted for education and age group

Supplementary Table 7: Odds ratios of cervical cancer (all types) in relation to screening status in the past two screening rounds, by age and stage of cancer cases

| Screening status <sup>a</sup> | Stage IA (microinvasive) |                     |                 |                          | Stage IB+ (frankly invasive) |                     |                 |                          | Stage II+ (advanced) |                     |                 |                          |
|-------------------------------|--------------------------|---------------------|-----------------|--------------------------|------------------------------|---------------------|-----------------|--------------------------|----------------------|---------------------|-----------------|--------------------------|
|                               | No. of case sub.         | No. of control sub. | OR              | OR adjusted <sup>b</sup> | No. of case sub.             | No. of control sub. | OR              | OR adjusted <sup>b</sup> | No. of case sub.     | No. of control sub. | OR              | OR adjusted <sup>b</sup> |
| <b>Age 26-28<sup>c</sup></b>  |                          |                     |                 |                          |                              |                     |                 |                          |                      |                     |                 |                          |
| Unscreened                    | 35                       | 683                 | 2.32(1.37-3.94) | 2.82(1.65-4.80)          | 33                           | 821                 | 1.38(0.86-2.22) | 1.57(0.97-2.53)          | 6                    | 206                 | 0.81(0.30-2.20) | 1.09(0.40-2.97)          |
| Screened                      | 24                       | 1087                | Ref.            | Ref.                     | 38                           | 1309                | Ref.            | Ref.                     | 12                   | 334                 | Ref.            | Ref.                     |
| <b>Age 29-39</b>              |                          |                     |                 |                          |                              |                     |                 |                          |                      |                     |                 |                          |
| Unscr. – Unscr.               | 71                       | 1639                | 2.14(1.58-2.89) | 2.47(1.82-3.35)          | 152                          | 2559                | 2.93(2.36-3.64) | 3.19(2.56-3.98)          | 46                   | 587                 | 5.32(3.35-8.43) | 5.52(3.45-8.85)          |
| Scr. – Unscr.                 | 128                      | 1803                | 3.48(2.69-4.50) | 3.51(2.71-4.53)          | 165                          | 2924                | 2.78(2.25-3.44) | 2.76(2.23-3.41)          | 33                   | 596                 | 3.74(2.28-6.12) | 3.70(2.26-6.07)          |
| Unscr. – Scr.                 | 64                       | 2222                | 1.41(1.04-1.92) | 1.44(1.06-1.96)          | 108                          | 3496                | 1.53(1.20-1.94) | 1.52(1.20-1.93)          | 27                   | 788                 | 2.34(1.39-3.94) | 2.32(1.38-3.91)          |
| Scr. – Scr.                   | 117                      | 5704                | Ref.            | Ref.                     | 194                          | 9540                | Ref.            | Ref.                     | 32                   | 2163                | Ref.            | Ref.                     |
| <b>Age 40-49</b>              |                          |                     |                 |                          |                              |                     |                 |                          |                      |                     |                 |                          |
| Unscr. – Unscr.               | 52                       | 724                 | 3.83(2.64-5.56) | 3.62(2.46-5.32)          | 219                          | 2185                | 5.42(4.44-6.62) | 5.71(4.67-6.99)          | 112                  | 695                 | 10.5(7.51-14.7) | 10.8(7.69-15.2)          |
| Scr. – Unscr.                 | 50                       | 861                 | 3.12(2.14-4.54) | 3.12(2.14-4.55)          | 123                          | 2588                | 2.58(2.05-3.26) | 2.59(2.06-3.26)          | 19                   | 844                 | 1.45(0.86-2.47) | 1.45(0.86-2.47)          |
| Unscr. – Scr.                 | 41                       | 1048                | 2.09(1.41-3.11) | 2.08(1.40-3.09)          | 87                           | 2998                | 1.58(1.22-2.04) | 1.59(1.23-2.05)          | 22                   | 1010                | 1.43(0.86-2.36) | 1.41(0.86-2.34)          |
| Scr. – Scr.                   | 66                       | 3498                | Ref.            | Ref.                     | 192                          | 10412               | Ref.            | Ref.                     | 54                   | 3493                | Ref.            | Ref.                     |
| <b>Age 50-65</b>              |                          |                     |                 |                          |                              |                     |                 |                          |                      |                     |                 |                          |
| Unscr. – Unscr.               | 24                       | 375                 | 2.55(1.56-4.16) | 2.45(1.48-4.04)          | 361                          | 2776                | 6.82(5.81-8.01) | 6.91(5.88-8.13)          | 271                  | 1522                | 14.5(11.4-18.4) | 14.6(11.4-18.5)          |
| Scr. – Unscr.                 | 25                       | 475                 | 2.14(1.30-3.50) | 2.11(1.29-3.45)          | 137                          | 3658                | 2.02(1.64-2.50) | 2.02(1.63-2.49)          | 59                   | 1973                | 2.57(1.84-3.58) | 2.54(1.82-3.55)          |
| Unscr. – Scr.                 | 22                       | 492                 | 1.75(1.05-2.90) | 1.73(1.04-2.88)          | 92                           | 3144                | 1.49(1.17-1.89) | 1.49(1.17-1.89)          | 38                   | 1658                | 1.84(1.26-2.69) | 1.83(1.25-2.68)          |
| Scr. – Scr.                   | 57                       | 2232                | Ref.            | Ref.                     | 302                          | 15243               | Ref.            | Ref.                     | 101                  | 7926                | Ref.            | Ref.                     |
| <b>Age 66+<sup>d</sup></b>    |                          |                     |                 |                          |                              |                     |                 |                          |                      |                     |                 |                          |
| Unscr. – Unscr.               | 18                       | 542                 | 0.97(0.39-2.40) | 1.02(0.40-2.55)          | 814                          | 18870               | 2.50(2.01-3.11) | 2.46(1.98-3.07)          | 637                  | 14662               | 3.06(2.33-4.02) | 2.97(2.26-3.91)          |
| Scr. – Unscr.                 | 10                       | 269                 | 1.08(0.43-2.71) | 1.12(0.44-2.82)          | 145                          | 5138                | 1.27(0.99-1.64) | 1.26(0.98-1.62)          | 102                  | 3646                | 1.50(1.09-2.05) | 1.47(1.07-2.01)          |
| Unscr. – Scr.                 | 6                        | 112                 | 1.57(0.52-4.71) | 1.59(0.53-4.77)          | 82                           | 2889                | 1.50(1.12-2.02) | 1.50(1.11-2.02)          | 61                   | 2176                | 1.78(1.24-2.55) | 1.77(1.23-2.53)          |
| Scr. – Scr.                   | 9                        | 261                 | Ref.            | Ref.                     | 108                          | 4939                | Ref.            | Ref.                     | 66                   | 3579                | Ref.            | Ref.                     |

Unscr. = Unscreened; Scr. = Screened

- Left hand side of hyphen represents the previous screening round, and right-hand side represents the most recent screening round
- Adjusted for education and age group
- This age group only experienced one screening round prior to cancer diagnosis
- Screening status for this age group refers to screening at ages 56-65
